# Supplementary material for: A Novel Necroptosis-Related Prognostic Signature of Glioblastoma Based on Transcriptomics Analysis and Single Cell Sequencing Analysis
Source: Brain Sci. 2022 Jul 26;12(8):988. doi: 10.3390/brainsci12080988 (PMC9460316; doi:10.3390/brainsci12080988)
Supplement: Supplementary file 1 [file brainsci-12-00988-s001.zip]

Archive with 4 entries (4 files):
- Figure S1.pdf
- Table S1 Baseline of GBM patients.xlsx
- Table S2 Cell Types Annotation.txt
- Table S3 Machine learning algorithms and results.xlsx
