# Supplementary material for: A Novel Necroptosis-Related Prognostic Signature of Glioblastoma Based on Transcriptomics Analysis and Single Cell Sequencing Analysis
Source: Brain Sci. 2022 Jul 26;12(8):988. doi: 10.3390/brainsci12080988 (PMC9460316; doi:10.3390/brainsci12080988)
Supplement: Supplementary file 1 [file brainsci-12-00988-s001.zip › Table S1 Baseline of GBM patients.xlsx]

## Sheet: baseline
	Alive (n=31)	Dead (n=112)	Total (n=143)
Sex	NA	NA	NA
Female	12 (38.7%)	36 (32.1%)	48 (33.6%)
Male	19 (61.3%)	76 (67.9%)	95 (66.4%)
Age(Mean (SD))	56.2 (16.1)	61.1 (12.7)	60.1 (13.6)
Age(Median [MIN, MAX])	57.3 [21.7,82.1]	62.3 [21.4,89.3]	61 [21.4,89.3]
Race	NA	NA	NA
Asian	2 (6.5%)	3 (2.7%)	5 (3.5%)
Black or african american	4 (12.9%)	4 (3.6%)	8 (5.6%)
not reported	0 (0.0%)	1 (0.9%)	1 (0.7%)
white	25 (80.6%)	104 (92.9%)	129 (90.2%)
