# Supplementary material for: A Novel Necroptosis-Related Prognostic Signature of Glioblastoma Based on Transcriptomics Analysis and Single Cell Sequencing Analysis
Source: Brain Sci. 2022 Jul 26;12(8):988. doi: 10.3390/brainsci12080988 (PMC9460316; doi:10.3390/brainsci12080988)
Supplement: Supplementary file 1 [file brainsci-12-00988-s001.zip › Table S2 Cell Types Annotation.txt]

gene	Cell Type
CD3E	T cell
PTPRC	T cell
CD8A	T cell
NKG7	T cell
CD79A	B cell
GFAP	Glioblastoma
SOX2	Glioblastoma
PDGFRA	Glioblastoma
S100B	Glioblastoma
EGFR	Glioblastoma
NES	Glioblastoma
OLIG1	Glioblastoma
S100A8	Myeloid cell
C1QB	Myeloid cell
KLF2	Myeloid cell
CEBPD	Myeloid cell
MAFB	Myeloid cell
CD68	Myeloid cell
GATA2	Myeloid cell
ACTA2	Pericytes
PDGFRB	Pericytes
MBP	Oligodendrocytes
PECAM1	Endothelial cells
TEK	Endothelial cells
