# Supplementary material for: A Novel Necroptosis-Related Prognostic Signature of Glioblastoma Based on Transcriptomics Analysis and Single Cell Sequencing Analysis
Source: Brain Sci. 2022 Jul 26;12(8):988. doi: 10.3390/brainsci12080988 (PMC9460316; doi:10.3390/brainsci12080988)
Supplement: Supplementary file 1 [file brainsci-12-00988-s001.zip › Table S3 Machine learning algorithms and results.xlsx]

## Sheet: Sheet1
Lasso	SVMRFE	Boruta	Overlapping genes
AP1S1	AP1S1	CTSD	CTSD
CHPF	CHPF	AP1S1	AP1S1
COMMD2	COMMD2	CTSB	YWHAG
CTSD	CTSB	YWHAG	IER3
ENAH	CTSD	IER3
GRN	ENAH	PLAUR
HEXA	IER3
IER3	NFKBIZ
NDUFB2	PDIA4
NFKBIZ	PLAUR
SLC16A3	TMED4
TMED4	TNFAIP3
TNFAIP3	YWHAG
YWHAG
