# Supplementary figures and images for: A Novel Necroptosis-Related Prognostic Signature of Glioblastoma Based on Transcriptomics Analysis and Single Cell Sequencing Analysis
Source: MDPI journal article supplement (doi:10.3390/brainsci12080988), 2022-07-26

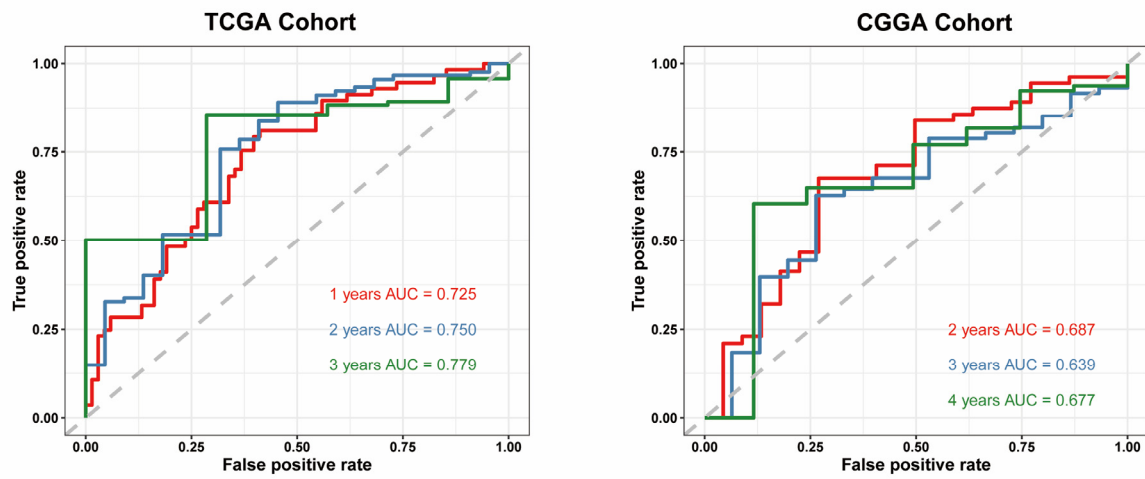

**Figure S1.** ROC curves of the training and validation cohorts.

Supplement: s1 [file s1]
